# Supplementary material
Source: publisher figshare collection journal article supplement (https://tandf.figshare.com/articles/dataset/_/10327298)
Supplement: Supplementary file 1 [file 1]

Archive with 2 entries (2 files):
- renc_a_1687101_sm6176.pdf
- renc_a_1687101_sm6164.pdf
