# Supplementary material
Source: publisher figshare collection journal article supplement (https://tandf.figshare.com/articles/dataset/_/10327298)
Supplement: Supplementary file 1 [file 1 › renc_a_1687101_sm6176.pdf]

### Supporting information 1: Aggregated list of operating citizen science projects

| Project Name                        | Bonney et al. 2009 | Dickinson et al. 2010 | Franzoni & Sauermann, 2014 | Kullenberg & Kasperowski 2016 | Science Communication Unit, 2013 | Slivertown 2009 | Wiggins & Crowston, 2011 | Number of listings in review papers |
|-------------------------------------|--------------------|-----------------------|----------------------------|-------------------------------|----------------------------------|-----------------|--------------------------|-------------------------------------|
| Achuar-Amazon Watch initiative      |                    |                       |                            |                               | X                                |                 |                          | 1                                   |
| Agent Exoplanet                     |                    |                       |                            | X                             |                                  |                 |                          | 1                                   |
| Air Quality Egg                     |                    |                       |                            |                               | X                                |                 |                          | 1                                   |
| Alabama Water Watch                 |                    |                       |                            | X                             |                                  |                 |                          | 1                                   |
| ALLARM Acid Rain Monitoring Project | X                  |                       |                            |                               | X                                |                 |                          | 2                                   |
| Amateurs as Experts                 |                    |                       |                            |                               | X                                |                 |                          | 1                                   |
| Ancient Lives                       |                    |                       | X                          |                               |                                  |                 |                          | 1                                   |
| Argus                               |                    |                       | X                          |                               |                                  |                 |                          | 1                                   |
| Astronomers without borders         |                    |                       |                            | X                             |                                  |                 |                          | 1                                   |
| Astrosphere New Media Association   |                    |                       |                            | X                             |                                  |                 |                          | 1                                   |
| Avian Knowledge Network             |                    | X                     |                            | X                             |                                  |                 |                          | 2                                   |
| Barcoding Life's Matrix             |                    |                       |                            | X                             |                                  |                 |                          | 1                                   |
| Barnegat Bay Partnership            |                    |                       |                            |                               | X                                |                 |                          | 1                                   |
| Bat Detective                       |                    |                       | X                          |                               | X                                |                 |                          | 2                                   |
| Bay Area Ant Survey                 |                    |                       |                            |                               |                                  |                 | X                        | 1                                   |
| Big Butterfly Count                 |                    |                       |                            |                               | X                                |                 |                          | 1                                   |
| Big Garden BirdWatch                |                    | X                     |                            | X                             |                                  |                 |                          | 2                                   |
| Big Sleep Survey                    |                    |                       |                            | X                             |                                  |                 |                          | 1                                   |
| Bird Source                         |                    |                       |                            | X                             |                                  |                 |                          | 1                                   |

|                                                       |   |   |   |   |   |   |   |   |
|-------------------------------------------------------|---|---|---|---|---|---|---|---|
| Birdhouse Network (now NestWatch)                     | X | X | X | X | X |   |   | 5 |
| Birds in Forested Landscapes                          |   |   |   | X |   |   |   | 1 |
| BirdTrack                                             |   |   |   | X |   |   |   | 1 |
| Britain's Common Birds Census                         |   | X |   | X |   |   |   | 2 |
| British Trust for Ornithology                         |   | X |   |   |   | X |   | 2 |
| Buckeye Lady Beetle Blitz                             |   |   |   |   | X |   |   | 1 |
| Butterfly Conservation Europe – Butterfly Monitoring  |   |   |   |   | X |   |   | 1 |
| California Roadkill Observation System                |   |   |   | X |   |   |   | 1 |
| CamClickr                                             |   |   |   | X |   |   |   | 1 |
| Cell Slider                                           |   |   |   | X |   |   |   | 1 |
| Chicago Wilderness Project                            |   |   |   | X |   |   |   | 1 |
| Christmas Bird Count                                  |   | X |   | X | X | X |   | 4 |
| Citizen Science Canada                                |   |   |   |   |   | X |   | 1 |
| Citizen Sparrow                                       |   |   |   | X |   |   |   | 1 |
| Citizen-led activities at Lake Kirkkojärvi            |   |   |   |   | X |   |   | 1 |
| CitizenWeather Observer Program                       |   | X |   |   |   |   |   | 1 |
| ClimatePrediction.net                                 |   |   |   |   | X |   |   | 1 |
| Community Collaborative Rain, Hail & Snow Network     | X |   |   |   | X |   | X | 3 |
| Community Health Effects of Industrial Hog Operations | X |   |   |   | X |   |   | 2 |
| Connect2Decode                                        |   |   | X |   |   |   |   | 1 |
| Cooperative Observer Program                          |   |   |   | X |   |   |   | 1 |

|                                    |  |   |   |   |   |   |   |   |
|------------------------------------|--|---|---|---|---|---|---|---|
| Corfe Mullen Bio-Blitz             |  |   |   |   | X |   |   | 1 |
| CreekFreaks                        |  |   |   |   | X |   |   | 1 |
| Crowd Computing                    |  |   | X |   |   |   |   | 1 |
| Cybertracker                       |  |   |   | X |   |   |   | 1 |
| Cyclone Center                     |  |   | X |   |   |   |   | 1 |
| Did You Feel It?                   |  |   |   |   |   |   | X | 1 |
| Discover life                      |  |   | X |   |   |   |   | 1 |
| eBird                              |  | X | X | X | X | X | X | 6 |
| Eco21.PL                           |  |   |   |   | X |   |   | 1 |
| Erie Rising                        |  |   |   |   | X |   |   | 1 |
| EteRNA                             |  |   | X |   |   |   |   | 1 |
| evolution mega lab                 |  | X |   | X |   | X |   | 3 |
| Explore the Seafloor               |  |   |   | X |   |   |   | 1 |
| Eye on Earth                       |  |   |   |   | X |   |   | 1 |
| Feeder watch                       |  |   |   | X |   |   |   | 1 |
| Firefly Watch                      |  | X |   |   |   |   | X | 2 |
| Florida LAKEWATCH                  |  |   |   | X |   |   |   | 1 |
| Fold It                            |  | X | X | X |   |   | X | 4 |
| Fossil Finders                     |  |   |   |   |   |   | X | 1 |
| French Garden Butterfly Monitoring |  | X |   |   |   |   |   | 1 |
| FrogWatch USA                      |  | X |   | X |   |   |   | 2 |
| FuturICT                           |  |   |   |   | X |   |   | 1 |
| Galaxy Zoo                         |  | X | X | X | X |   | X | 5 |
| Galileoscope Project               |  |   |   | X |   |   |   | 1 |
| Garden Moths Count                 |  | X |   | X |   |   |   | 2 |
| Genographic Project                |  |   |   | X |   |   |   | 1 |

|                                                           |   |   |   |   |   |   |   |   |
|-----------------------------------------------------------|---|---|---|---|---|---|---|---|
| Globe at Night                                            |   |   |   | X |   |   | X | 2 |
| Gravestone Project                                        |   |   |   |   |   |   | X | 1 |
| Great Backyard Bird count                                 |   |   | X | X |   |   |   | 2 |
| Great LakeWormWatch                                       |   | X |   |   |   |   |   | 1 |
| Great Pollinator Project                                  |   |   |   | X |   |   |   | 1 |
| GWAP                                                      |   | X |   |   |   |   |   | 1 |
| HawkWatch                                                 |   |   |   | X |   |   |   | 1 |
| House Finch Disease Survey                                |   |   |   | X |   |   |   | 1 |
| Hunter Valley rehabilitation project                      |   |   |   |   | X |   |   | 1 |
| Ice Hunters                                               |   |   | X |   |   |   |   | 1 |
| iNaturalist                                               |   |   |   | X |   |   |   | 1 |
| Invaders of Texas                                         |   |   |   | X |   |   |   | 1 |
| Invasive crabs (US) project                               |   |   |   |   | X |   |   | 1 |
| Invasive Plant Atlas of New England                       | X |   |   |   | X |   | X | 3 |
| Invasive species survey                                   |   |   |   |   |   |   |   | 0 |
| Invasive Tracers                                          |   | X |   |   |   |   |   | 1 |
| ITDG Zimbabwe project to restore local food security (p9) |   |   |   |   | X |   |   | 1 |
| Juvenile Lobster Monitoring Program                       |   |   |   | X |   |   |   | 1 |
| Lost Ladybug Project                                      |   | X |   | X | X | X | X | 5 |
| Maine Audubon Wildlife Road Watch                         |   |   |   | X |   |   |   | 1 |
| Manta Matcher                                             |   |   |   | X |   |   |   | 1 |
| Michigan Sea Grant                                        |   |   |   | X |   |   |   | 1 |
| Milkyway Project                                          |   |   | X | X |   |   |   | 2 |

|                                                          |   |   |   |   |   |  |   |   |
|----------------------------------------------------------|---|---|---|---|---|--|---|---|
| Missouri Stream Team Program                             |   |   |   |   |   |  | X | 1 |
| Monarch Larva Monitoring Project                         | X | X |   | X | X |  | X | 5 |
| Monarch Watch                                            |   |   |   | X |   |  |   | 1 |
| Monitoring H <sub>2</sub> O aufige Brutv <sup>o</sup> ge |   | X |   |   |   |  |   | 1 |
| Moon Zoo                                                 |   |   | X | X |   |  |   | 2 |
| MykoWeb                                                  |   | X |   |   |   |  |   | 1 |
| NASA's Earth Observatory                                 |   | X |   |   |   |  |   | 1 |
| National Bat Monitoring Programme                        |   |   |   |   | X |  |   | 1 |
| National BioBlitz Network                                |   |   |   |   | X |  |   | 1 |
| National Biodiversity Network                            |   |   |   |   |   |  |   | 0 |
| Nature North                                             |   | X |   |   |   |  |   | 1 |
| Nature's calendar                                        |   |   |   | X |   |  |   | 1 |
| Nature's Notebook                                        |   |   |   | X |   |  |   | 1 |
| Neighborhood nestwatch                                   |   |   |   | X |   |  |   | 1 |
| Nest Record Scheme                                       |   |   |   | X |   |  |   | 1 |
| North American Amphibian Monitoring Program              |   | X |   | X |   |  |   | 2 |
| North American Bird Phenology Program                    |   | X |   | X |   |  |   | 2 |
| North American Breeding Bird Survey                      |   | X |   | X |   |  |   | 2 |
| Northeast Phenology Monitoring                           |   |   |   |   |   |  | X | 1 |
| Notes from Nature                                        |   |   | X | X |   |  |   | 2 |
| OakMapper                                                |   |   |   | X |   |  |   | 1 |
| Ocean Optical Monitoring                                 |   |   |   |   | X |  |   | 1 |

|                                                        |  |   |   |   |   |   |   |   |
|--------------------------------------------------------|--|---|---|---|---|---|---|---|
| Old Weather                                            |  |   | X |   | X |   |   | 2 |
| OMNISCIENTIS – Odour Monitoring and Information System |  |   |   | X |   |   |   | 1 |
| OPAL – Open Air Laboratories                           |  | X |   | X | X | X |   | 4 |
| Open Dinosaur Project                                  |  |   | X |   |   |   | X | 2 |
| Open Street Map project                                |  |   |   |   | X |   |   | 1 |
| Orchive                                                |  |   |   | X |   |   |   | 1 |
| pacewraps                                              |  |   | X |   |   |   |   | 1 |
| Pan-European Common Bird Monitoring Scheme             |  |   |   |   | X |   |   | 1 |
| Patientslikeme                                         |  |   | X | X |   |   |   | 2 |
| Peppered moth                                          |  |   |   |   |   | X |   | 1 |
| Perfect Pitch Test                                     |  |   |   |   |   |   | X | 1 |
| Phylo                                                  |  |   | X |   |   |   |   | 1 |
| Phytoplankton Monitoring Network                       |  |   |   | X |   |   |   | 1 |
| Picture Post                                           |  |   |   |   | X |   |   | 1 |
| PigeonWatch                                            |  |   | X |   |   | X |   | 2 |
| Planet Hunters                                         |  |   | X | X |   |   |   | 2 |
| plant watch                                            |  | X |   |   |   |   |   | 1 |
| Plants of Concern                                      |  |   |   | X |   |   |   | 1 |
| Polymath                                               |  |   | X |   |   |   |   | 1 |
| Project Budburst, including floracaching game          |  |   |   |   | X |   |   | 1 |
| Project FeederWatch                                    |  | X |   |   |   |   |   | 1 |
| Project Implicit                                       |  |   |   |   |   |   | X | 1 |
| Protea Atlas Project                                   |  |   |   |   |   |   |   | 0 |

|                                                        |   |   |   |   |   |  |   |   |
|--------------------------------------------------------|---|---|---|---|---|--|---|---|
| PublicLab                                              |   |   |   | X |   |  |   | 1 |
| Radio Jove Project                                     |   |   |   |   |   |  | X | 1 |
| Reclam the Bay                                         | X |   |   |   | X |  | X | 3 |
| Redmap                                                 |   |   |   | X |   |  |   | 1 |
| REEF                                                   |   | X |   |   |   |  |   | 1 |
| Road Watch                                             |   | X |   |   |   |  |   | 1 |
| Road Watch in the Pass                                 |   |   |   | X |   |  |   | 1 |
| Royal Docks Noise Mapping                              |   |   |   |   | X |  |   | 1 |
| Salal Harvest Sustainability Study                     | X |   |   |   | X |  |   | 2 |
| School of Ants                                         |   |   |   | X |   |  |   | 1 |
| Science, Democracy and Community Decisions on Fracking |   |   |   |   | X |  |   | 1 |
| Seafloor Explorer                                      |   |   | X |   | X |  |   | 2 |
| Secchi App                                             |   |   | X |   |   |  |   | 1 |
| SETI@Home                                              |   |   |   |   | X |  |   | 1 |
| Setilive                                               |   |   | X |   |   |  |   | 1 |
| Sherman's Creek Conservation Association               | X |   |   |   | X |  | X | 3 |
| Snapshot Serengeti                                     |   |   | X |   |   |  |   | 1 |
| SnowTweets                                             |   |   |   |   |   |  | X | 1 |
| Solar Stormwatch                                       |   |   | X |   |   |  |   | 1 |
| Space NEEMO                                            |   |   | X |   |   |  |   | 1 |
| Spotting the Weedy Invasives                           | X |   |   |   | X |  | X | 3 |
| Stardust@home                                          |   |   | X |   |   |  | X | 2 |
| Sun Lab                                                |   |   | X |   |   |  |   | 1 |

|                                                |  |   |   |   |   |  |   |   |
|------------------------------------------------|--|---|---|---|---|--|---|---|
| SusClime                                       |  |   |   |   | X |  |   | 1 |
| Swedish Species Gateway                        |  |   |   |   |   |  |   | 0 |
| Tag a Tiny                                     |  |   |   |   | X |  |   | 1 |
| The Chicken Coop Stakeout                      |  |   |   |   | X |  |   | 1 |
| The Great Sunflower Project                    |  | X | X | X | X |  | X | 5 |
| The Shale Network                              |  |   |   |   | X |  |   | 1 |
| The Smell Experience Project                   |  |   |   |   |   |  | X | 1 |
| Twitter Earthquake Detection Program           |  |   |   |   |   |  | X | 1 |
| UK Butterfly Monitoring Scheme                 |  | X |   |   |   |  |   | 1 |
| UK Ladybird Survey                             |  |   |   |   | X |  |   | 1 |
| USA-National Phenology Network                 |  | X |   |   |   |  |   | 1 |
| USGS Frog Quizzes                              |  | X |   |   |   |  |   | 1 |
| UVA Bay Game                                   |  |   |   |   | X |  |   | 1 |
| Vigie Nature                                   |  |   |   |   | X |  |   | 1 |
| WESENSEIT                                      |  |   |   |   | X |  |   | 1 |
| West Visayas State University teacher training |  |   |   |   | X |  |   | 1 |
| Wetland Bird Survey                            |  |   |   | X |   |  |   | 1 |
| Whale FM                                       |  |   |   | X |   |  |   | 1 |
| Whale Song                                     |  |   | X |   |   |  |   | 1 |
| What on Earth                                  |  |   |   |   |   |  | X | 1 |
| What's Invasive                                |  |   |   |   | X |  | X | 2 |
| What's the score                               |  |   | X |   |   |  |   | 1 |
| Who's Whoo-ing                                 |  |   |   |   |   |  | X | 1 |

|                                    |  |   |   |   |   |  |  |   |
|------------------------------------|--|---|---|---|---|--|--|---|
| Wider Countryside Butterfly Survey |  |   |   | X |   |  |  | 1 |
| Wormwatch                          |  | X |   |   |   |  |  | 1 |
| Yardmap                            |  | X | X | X | X |  |  | 4 |
